# Supplementary material for: Cosmeceutical Potentials of Equisetum debile Roxb. ex Vaucher Extracts
Source: MDPI journal article supplement (doi:10.3390/app13031336), 2023-01-19
Supplement: s1 [file s1]

## LC-MS/MS Analysis Method

*E. debile* crude extract were dissolved in DMSO at the concentration of 5 µg/ml and analyzed using Agilent 6545 LC/Q-TOF (Santa Clara, CA, USA) with Agilent Porshell 120 EC-C18 column (2.7 µm, 2.1x100 mm). The 3 µl of sample solution was injected using gradient system of two mobile phases (A) water and 0.1% acetic acid and (B) acetonitrile (CAN) and 0.1% acetic acid for 60 min. The gradient elution program was 100% A (0-30 min), 50% A (30-40 min), 0% A (40-51 min), 50% A (51-60 min). This was followed by a 10 min equilibrium period prior to the injection of next sample. Conditions for MS analysis of each HPLC peak included MS positive mode, Dual AJS ESI ion source, 320 °C gas temperature, 8 l/min drying gas, 35 psig nebulizer, 350 °C sheath gas temperature, 11 l/min sheath gas flow.

*E. debile* compounds were determined by analyzing the data against the library of approximately 5,000 reference compounds and then evaluated by 6200 series TOF/6500 series Q-TOF B.08.00 (B8058.0) acquisition software version. Only the phenolic compounds with a match score higher than 97 were reported in this study (Table S1). The asterisk (\*) indicates the proposed phenolic compounds suggested as being the most highly potentials in *E. debile* for further study.

**Table S1.** Proposed phenolic compounds in *E. debile* by LCMS qualitative identification.

| Compound Name                                                | RT     | Mass     | Difference DB (ppm) | Structure |
|--------------------------------------------------------------|--------|----------|---------------------|-----------|
| N-(2,5-Dihydroxyphenyl)pyridinium*                           | 1.69   | 188.0711 | 0.21                |           |
| Cernuoside*                                                  | 24.378 | 448.1016 | -1.07               |           |
| 1,2,6,8-Tetrahydroxy-3-methylantraquinone 2-O-β-D-glucoside* | 24.378 | 448.1016 | -2.38               |           |
| Hypolaetin 8-rhamnoside                                      | 24.378 | 448.1016 | -1.07               |           |
| Astragalin                                                   | 24.378 | 448.1016 | -1.07               |           |
| Naringenin-7-O-β-D-Glucuronide                               | 24.378 | 448.1016 | -1.07               |           |

**Table S1.** (continued) Proposed phenolic compounds in *E. debile* by LCMS qualitative identification.

| Compound Name                                         | RT     | Mass     | Difference DB (ppm) | Structure                                                                             |
|-------------------------------------------------------|--------|----------|---------------------|---------------------------------------------------------------------------------------|
| Naringenin-4'-O- $\beta$ -D-Glucuronide               | 24.378 | 448.1016 | -1.07               | 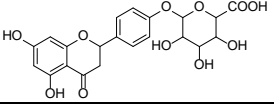   |
| 5,7,3',4'-Tetrahydroxy-4-phenylcoumarin 5-O-glucoside | 24.378 | 448.1016 | -1.07               |    |
| Datiscanin                                            | 24.378 | 448.1016 | -1.07               |    |
| Isorhamnetin 3-xyloside                               | 24.378 | 448.1016 | -1.07               |    |
| Luteolin 7-glucoside                                  | 24.378 | 448.1016 | -1.07               |   |
| Fisetin 7-glucoside                                   | 24.378 | 448.1016 | -1.07               |  |
| 7,8,3',4'-Tetrahydroxyisoflavone*                     | 24.378 | 286.0483 | -0.55               |  |
| 5,7,2',3'-Tetrahydroxyflavone                         | 24.775 | 286.0483 | -0.55               |  |
| Kaempferol                                            | 24.775 | 286.0483 | -0.55               |  |
| Fisetin                                               | 24.775 | 286.0483 | -0.55               |  |
| Baptigenin                                            | 24.775 | 286.0483 | -0.55               |  |
| 7,8,2',4'-Tetrahydroxyisoflavone                      | 24.775 | 286.0483 | -0.55               |  |

**Table S1.** (continued) Proposed phenolic compounds in *E. debile* by LCMS qualitative identification.

| Compound Name                  | RT     | Mass     | Difference DB (ppm) | Structure |
|--------------------------------|--------|----------|---------------------|-----------|
| Orobol                         | 24.775 | 286.0483 | -0.55               |           |
| 2'-Hydroxygenistein            | 24.775 | 286.0483 | -0.55               |           |
| 6-Hydroxygenistein             | 24.775 | 286.0483 | -0.55               |           |
| 7,3',4',5'-Tetrahydroxyflavone | 24.775 | 286.0483 | -0.55               |           |
| Rhamnazin 3-sophoroside*       | 27.405 | 654.1809 | -1.94               |           |
| Isopeonidin 3-rutinoside*      | 29.129 | 609.1834 | -2.41               |           |
| Tricetanidin*                  | 34.81  | 287.056  | -1.53               |           |
| Aurantidin                     | 34.81  | 287.056  | -0.44               |           |
| Hirsutidin*                    | 35.476 | 345.0981 | -1.85               |           |
| Gancaonin V*                   | 40.229 | 312.137  | -2.83               |           |
| Honyudisin                     | 40.229 | 312.137  | -0.88               |           |

**Table S1.** (continued) Proposed phenolic compounds in *E. debile* by LCMS qualitative identification.

| Compound Name                                              | RT     | Mass     | Difference DB (ppm) | Structure |
|------------------------------------------------------------|--------|----------|---------------------|-----------|
| 4-(3-Methyl-1-butenyl)-3,3',4',5-tetrahydroxystilbene      | 40.229 | 312.137  | -0.88               |           |
| m-(beta-Acetyl-alpha-ethyl-p-hydroxyphenethyl)benzoic acid | 40.229 | 312.137  | -0.88               |           |
| 4'-Prenyloxyresveratrol                                    | 40.229 | 312.137  | -0.88               |           |
| Desmosdumotin C                                            | 40.229 | 312.137  | -0.88               |           |
| (±)-threo-1-(4-Hydroxyphenyl)-1,2,3-propanetriol*          | 40.491 | 184.0738 | -1.22               |           |
| Arbutin*                                                   | 41.182 | 272.0899 | -1.24               |           |
| 3-Hydroxy-4-methoxyphenyllactic acid*                      | 41.184 | 212.0688 | -1.43               |           |
| Sinapoylputrescine*                                        | 41.953 | 294.1571 | 2.95                |           |
| (R)-(-)-Mellein*                                           | 42.561 | 178.0634 | -2.02               |           |
| Suillin*                                                   | 44.575 | 440.2915 | 2.55                |           |
| 3-(10-Heptadecenyl)phenol*                                 | 53.076 | 330.2922 | 0.25                |           |
